# Supplementary material for: Liquid crystal droplet design by using pseudopeptidic bottlebrush polymer additives
Source: Royal Society of Chemistry journal article supplement (doi:10.1039/d2sm00953f), 2022-01-01
Supplement: d2sm00953f1.pdf [file d2sm00953f1.pdf]

# Liquid Crystal Droplet Design by using Pseudopeptidic Bottlebrush Polymer Additives

*Asha Kumari,<sup>a</sup> Hanuman Singh,<sup>b</sup> Sameer Dhawan,<sup>b</sup> Surya Kant Bhardwaj,<sup>b</sup> V. Haridas<sup>b\*</sup> and  
Aloka Sinha<sup>a\*</sup>*

<sup>a</sup>Department of Physics, Indian Institute of Technology Delhi, Hauz Khas, New Delhi, India-  
110016.

<sup>b</sup>Department of Chemistry, Indian Institute of Technology Delhi, Hauz Khas, New Delhi, India-  
110016.

*Corresponding author e-mail address:*

V. Haridas - [haridasv@chemistry.iitd.ac.in](mailto:haridasv@chemistry.iitd.ac.in)

Aloka Sinha - [aloka@physics.iitd.ac.in](mailto:aloka@physics.iitd.ac.in),

**Table S1:** Surface free energy parameters (mN/m) of the used liquids.

| Liquid       | $\gamma_{lv}^{TOT}$ | $\gamma_{lv}^{LW}$ | $\gamma_{lv}^{AB}$ | $\gamma_{lv}^+$ | $\gamma_{lv}^-$ |
|--------------|---------------------|--------------------|--------------------|-----------------|-----------------|
| Water        | 72.8                | 21.8               | 51                 | 25.5            | 25.5            |
| Formamide    | 58                  | 39                 | 19                 | 2.28            | 39.6            |
| Diodomethane | 50.8                | 50.8               | 0                  | 0.72            | 0               |

**Table S2:** Molecular weight distribution of polymers as obtained from GPC using THF as eluent.

| Polymer    | Mn (Da) | Mw (Da) | PDI  |
|------------|---------|---------|------|
| <b>PFO</b> | 31252   | 44735   | 1.43 |
| <b>PFH</b> | 36038   | 51509   | 1.43 |
| <b>PEO</b> | 30766   | 48409   | 1.57 |
| <b>PEH</b> | 26197   | 36519   | 1.39 |

**Table S3:** Phase transition temperature of the prepared PDLC samples.

| Temperature  | <b>PFO6</b> | <b>PFO5</b> | <b>PFO4</b> | <b>PEO6</b> | <b>PEO5</b> | <b>PEO4</b> |
|--------------|-------------|-------------|-------------|-------------|-------------|-------------|
| Heating (°C) | 31.72       | 32.53       | 33.39       | 29.5        | 30.99       | 31.99       |
| Cooling (°C) | 31.43       | 32.22       | 33.11       | 29.37       | 30.8        | 31.73       |

**Table . S4:** Composition of pH solutions procured from ThermoFisher Scientific.

| <b>Buffer solution pH 4</b>                               |               |                 |
|-----------------------------------------------------------|---------------|-----------------|
| <b>Component</b>                                          | <b>CAS-No</b> | <b>Weight %</b> |
| Water                                                     | 7732-18-5     | <=99            |
| 1,2-benzenedicarboxylic acid, monopotassium salt          | 877-24-7      | 1.0             |
| Mercuric chloride                                         | 7487-94-7     | 0.001           |
| <b>Buffer Solution, pH 6.8</b>                            |               |                 |
| <b>Component</b>                                          | <b>CAS-No</b> | <b>Weight %</b> |
| Water                                                     | 7732-18-5     | 84.33           |
| 1,3-propanediol, 2-amino-2-(hydroxymethyl)-hydrochloride, | 1185-53-1     | 15.67           |
| <b>Buffer Solution pH 7</b>                               |               |                 |
| <b>Chemical Name</b>                                      | <b>CAS-No</b> | <b>Percent</b>  |
| Water                                                     | 7732-18-5     | 99.0            |
| Sodium hydroxide                                          | 1310-73-2     | <1.0            |
| Potassium phosphate monobasic                             | 7778-77-0     | <1.0            |
| <b>Buffer solution, pH 8.8</b>                            |               |                 |
| <b>Component</b>                                          | <b>CAS-No</b> | <b>Weight %</b> |
| Water                                                     | 7732-18-5     | 94.0            |
| Tris(hydroxymethyl)aminomethane                           | 77-86-1       | 6.0             |
| <b>Buffer solution, pH 10</b>                             |               |                 |
| <b>Component</b>                                          | <b>CAS-No</b> | <b>Weight %</b> |
| Water                                                     | 7732-18-5     | 99.0            |
| Potassium chloride                                        | 7447-40-7     | 0.373           |
| Boric acid (H <sub>3</sub> BO <sub>3</sub> )              | 10043-35-3    | 0.309           |
| Sodium hydroxide                                          | 1310-73-2     | 0.175           |

**Table S5:** The composition of second set of pH solutions.

**ThermoFisher Scientific**

**Buffer Solution, pH 4.00**

| <b>Component</b>                                  | <b>CAS No</b> | <b>Weight %</b> |
|---------------------------------------------------|---------------|-----------------|
| Water                                             | 7732-18-5     | 98.91           |
| 1,2-benzenedicarboxylic acid, monopotassium salt  | 877-24-7      | 1.0             |
| Formaldehyde                                      | 50-00-0       | 0.05            |
| Methyl alcohol                                    | 67-56-1       | 0.02            |
| Fluorescein, 2',4',5',7'-tetraiodo, disodium salt | 16423-68-0    | 0.02            |

**Buffer solution pH 10 Component CAS No Weight %**

| <b>Component</b>                                         | <b>CAS No</b> | <b>Weight %</b> |
|----------------------------------------------------------|---------------|-----------------|
| Water                                                    | 7732-18-5     | 97.5            |
| Ethylenediaminetetraacetic acid, disodium salt dihydrate | 6381-92-6     | 1.0             |
| Potassium carbonate                                      | 584-08-7      | 0.6             |
| Potassium hydroxide                                      | 1310-58-3     | 0.5             |
| Potassium Borate                                         | 12228-88-5    | 0.4             |

**Prepared Buffer Solution**

**Buffer solution pH 7**

| <b>Component</b>                     | <b>CAS No</b> | <b>Weight %</b> |
|--------------------------------------|---------------|-----------------|
| Water                                |               | 98.46           |
| Di-potassium hydrogen orthophosphate | 7758-11-4     | 0.92            |
| Potassium dihydrogen orthophosphate  | 7778-77-0     | 0.62            |

The formula used for calculating the buffer solution pH is<sup>17</sup>

$$\text{pH} = \text{pKa} + \log\left[\frac{A^-}{[HA]}\right] \quad (1)$$

HA – Weak Acid

A<sup>-</sup> - Conjugated base

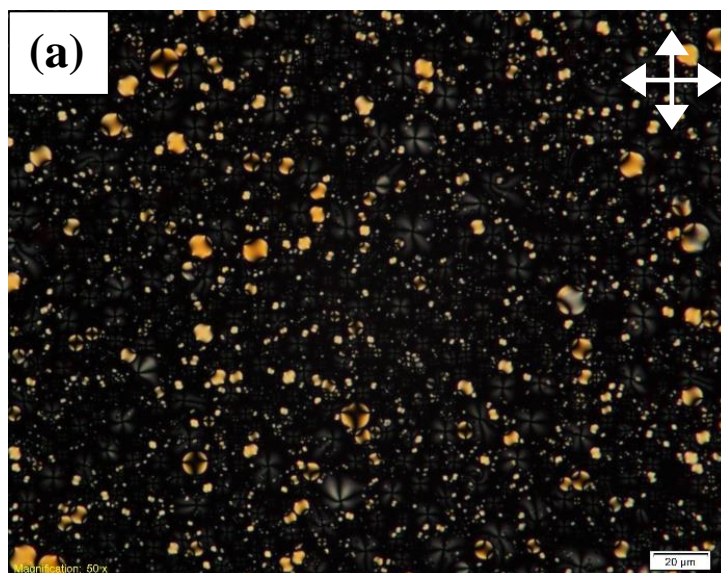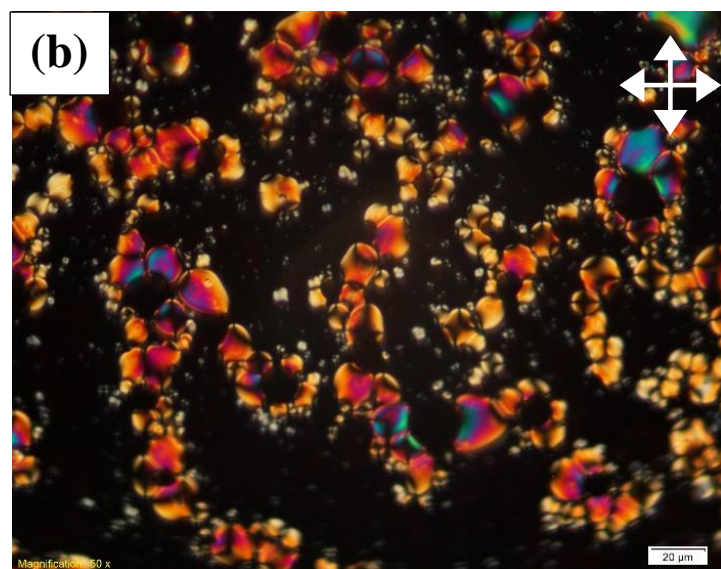

**Fig. S1:** POM image of PDLC sample prepared using 50 wt% PEO polymer and 50 wt% 5CB having solution concentration (a) 5% w/v, and (b) 10% w/v.

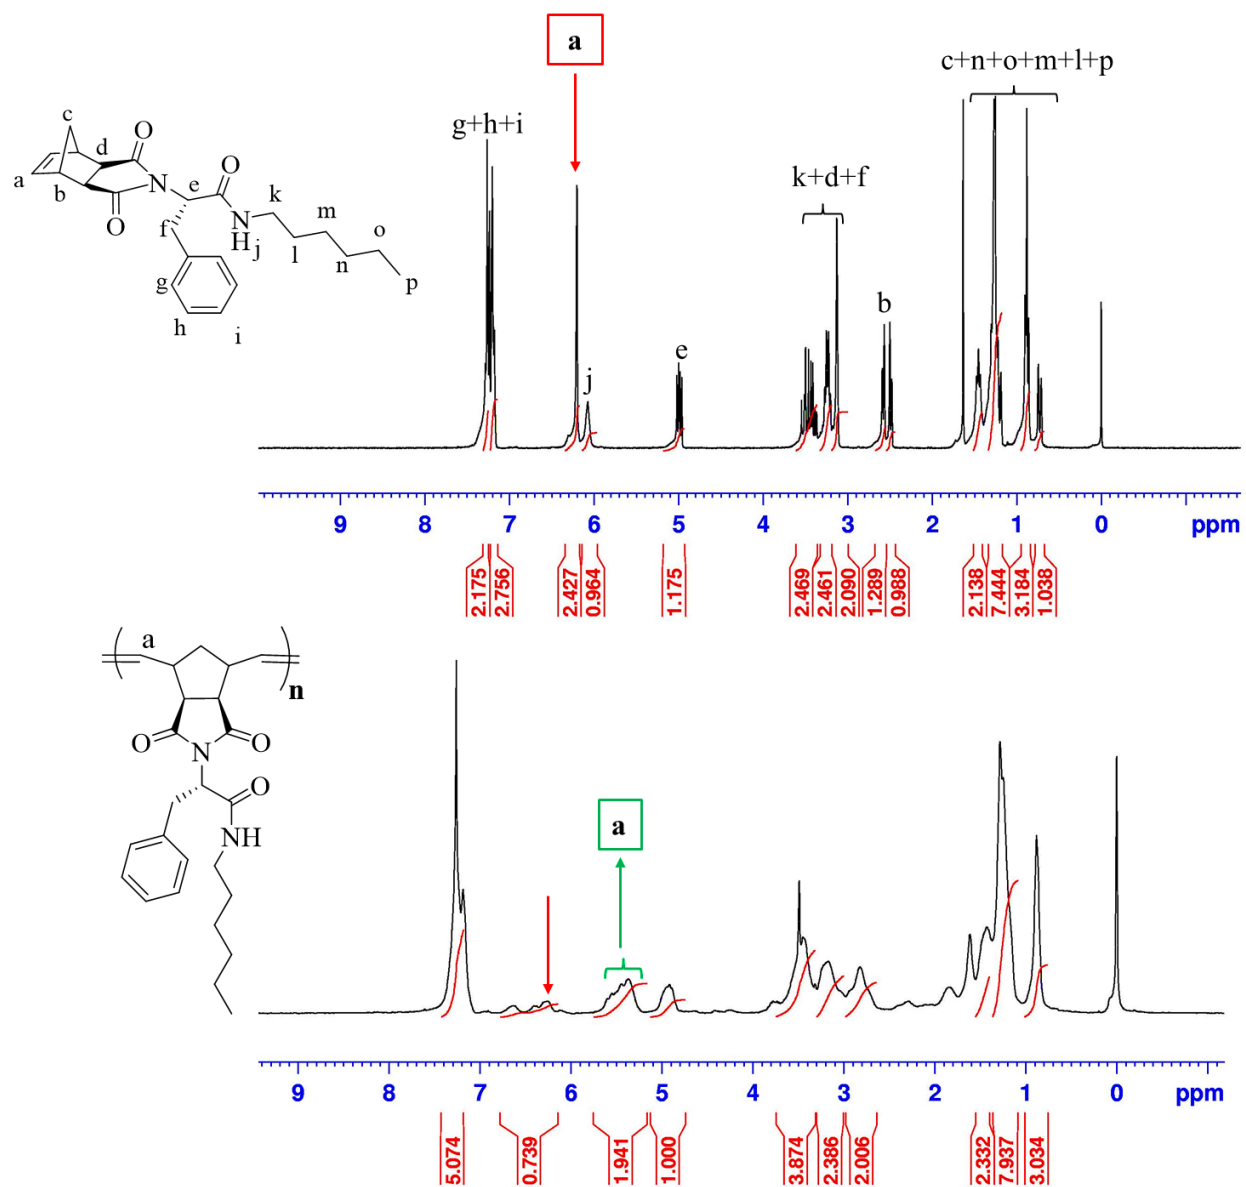

**Fig. S2:**  $^1\text{H}$  NMR ( $\text{CDCl}_3$ , 300 MHz) spectral comparison of monomer **FH** and **PFH**. The olefinic protons are marked as 'a'.

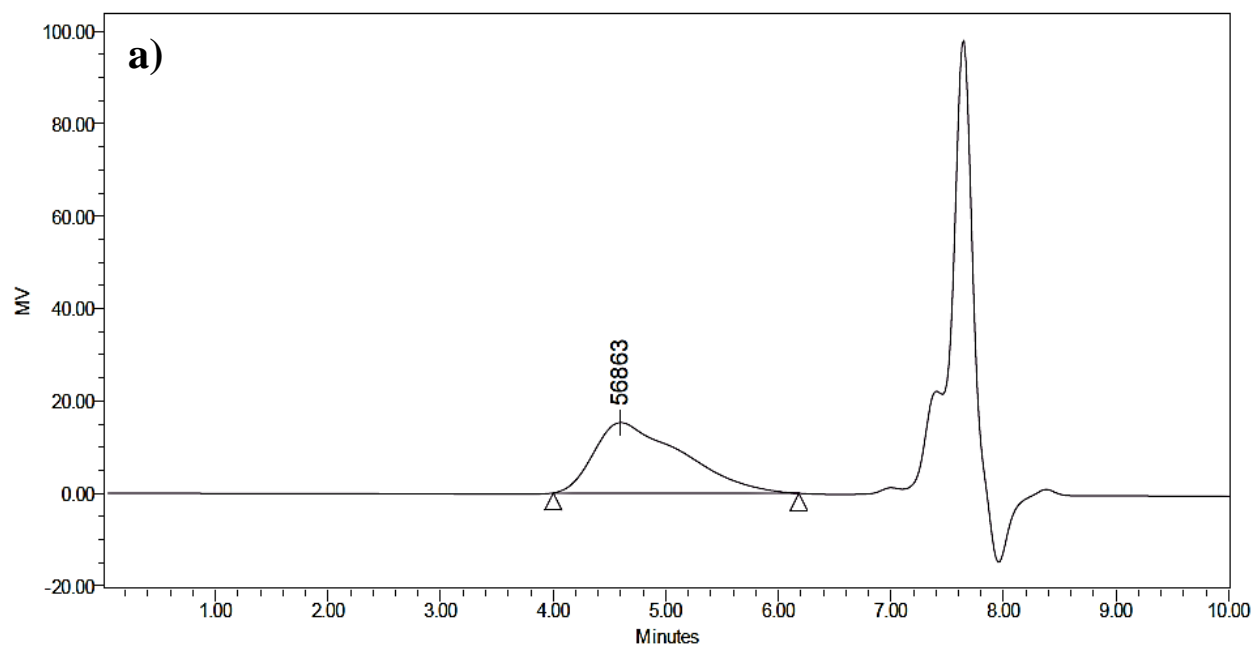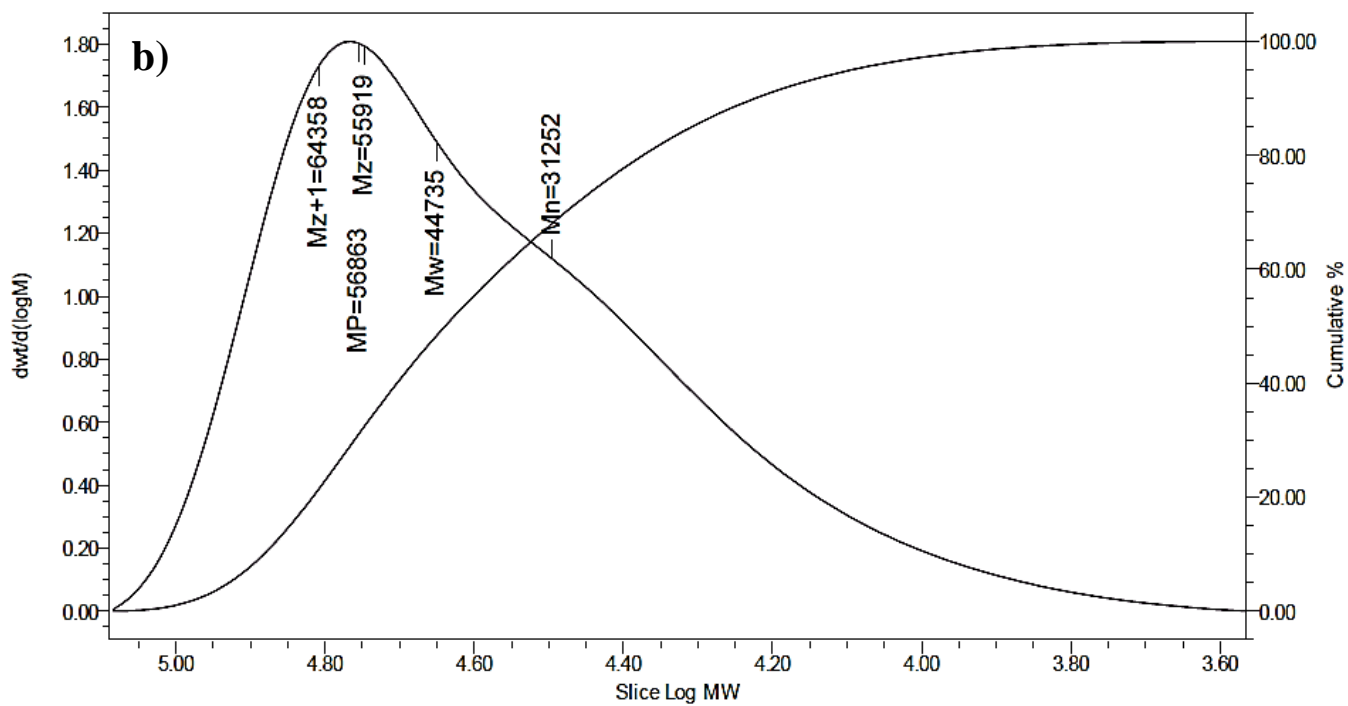

**Fig S3:** GPC profile of **PFO** a) complete chromatogram, b) expanded region of polymer peak.

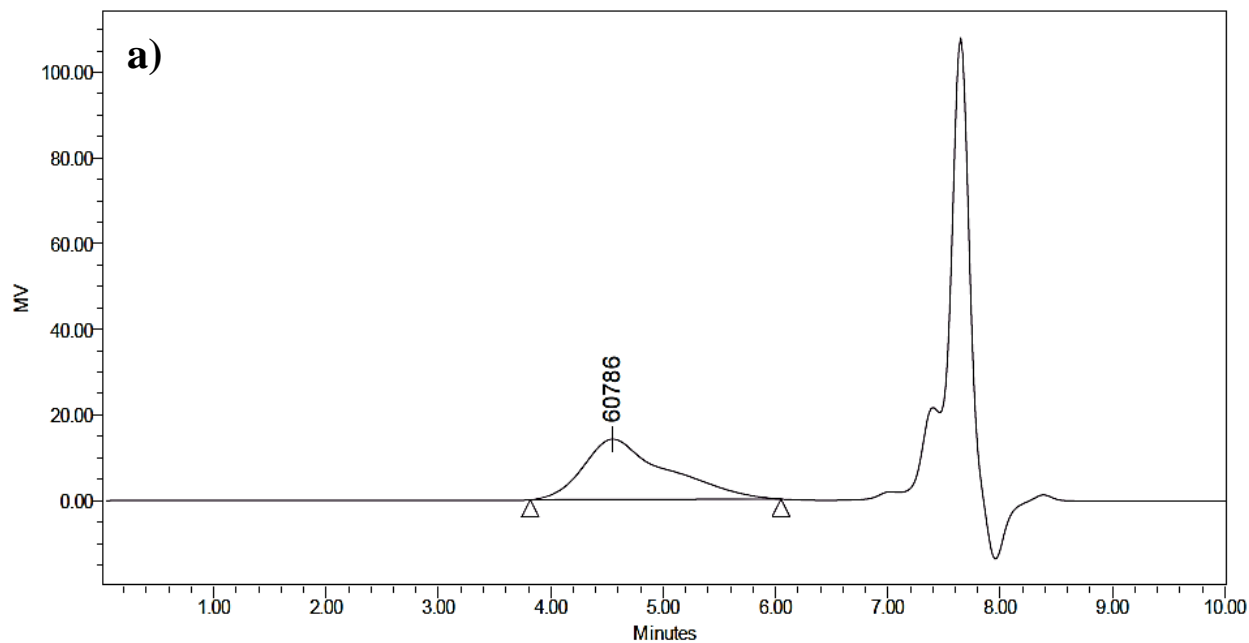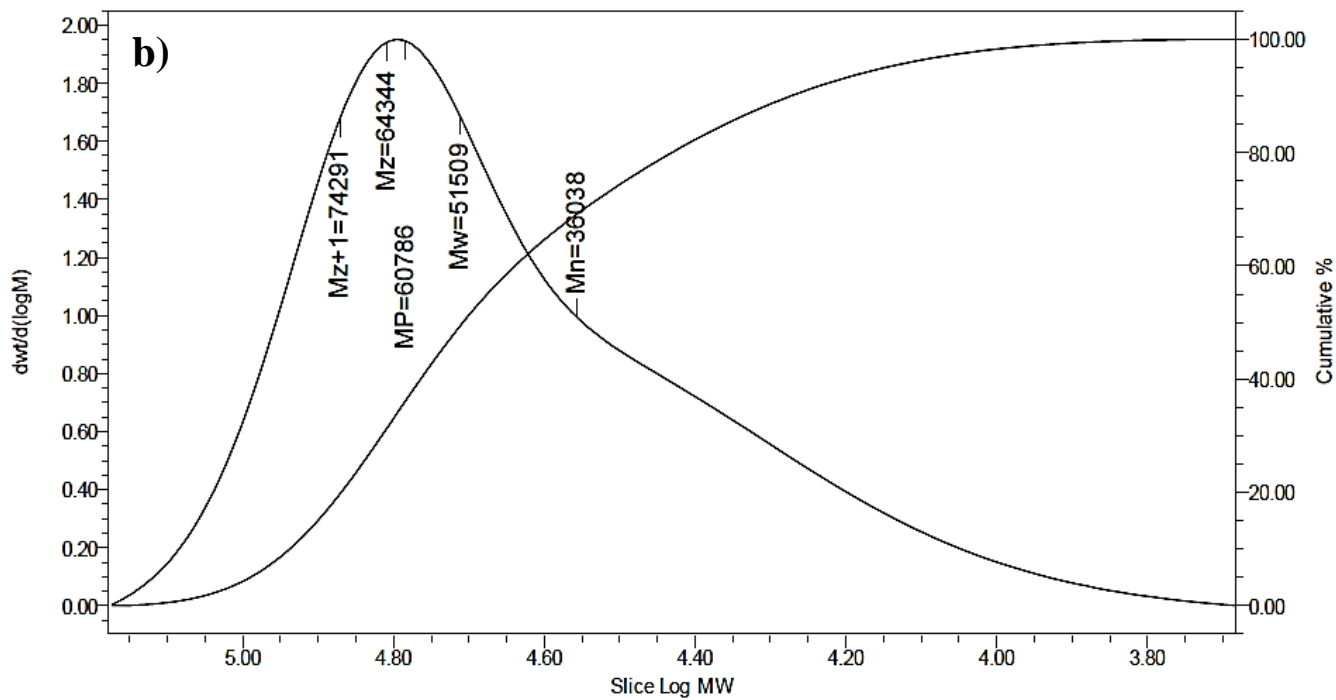

**Fig S4:** GPC profile of **PFH** a) complete chromatogram, b) expanded region of polymer peak.



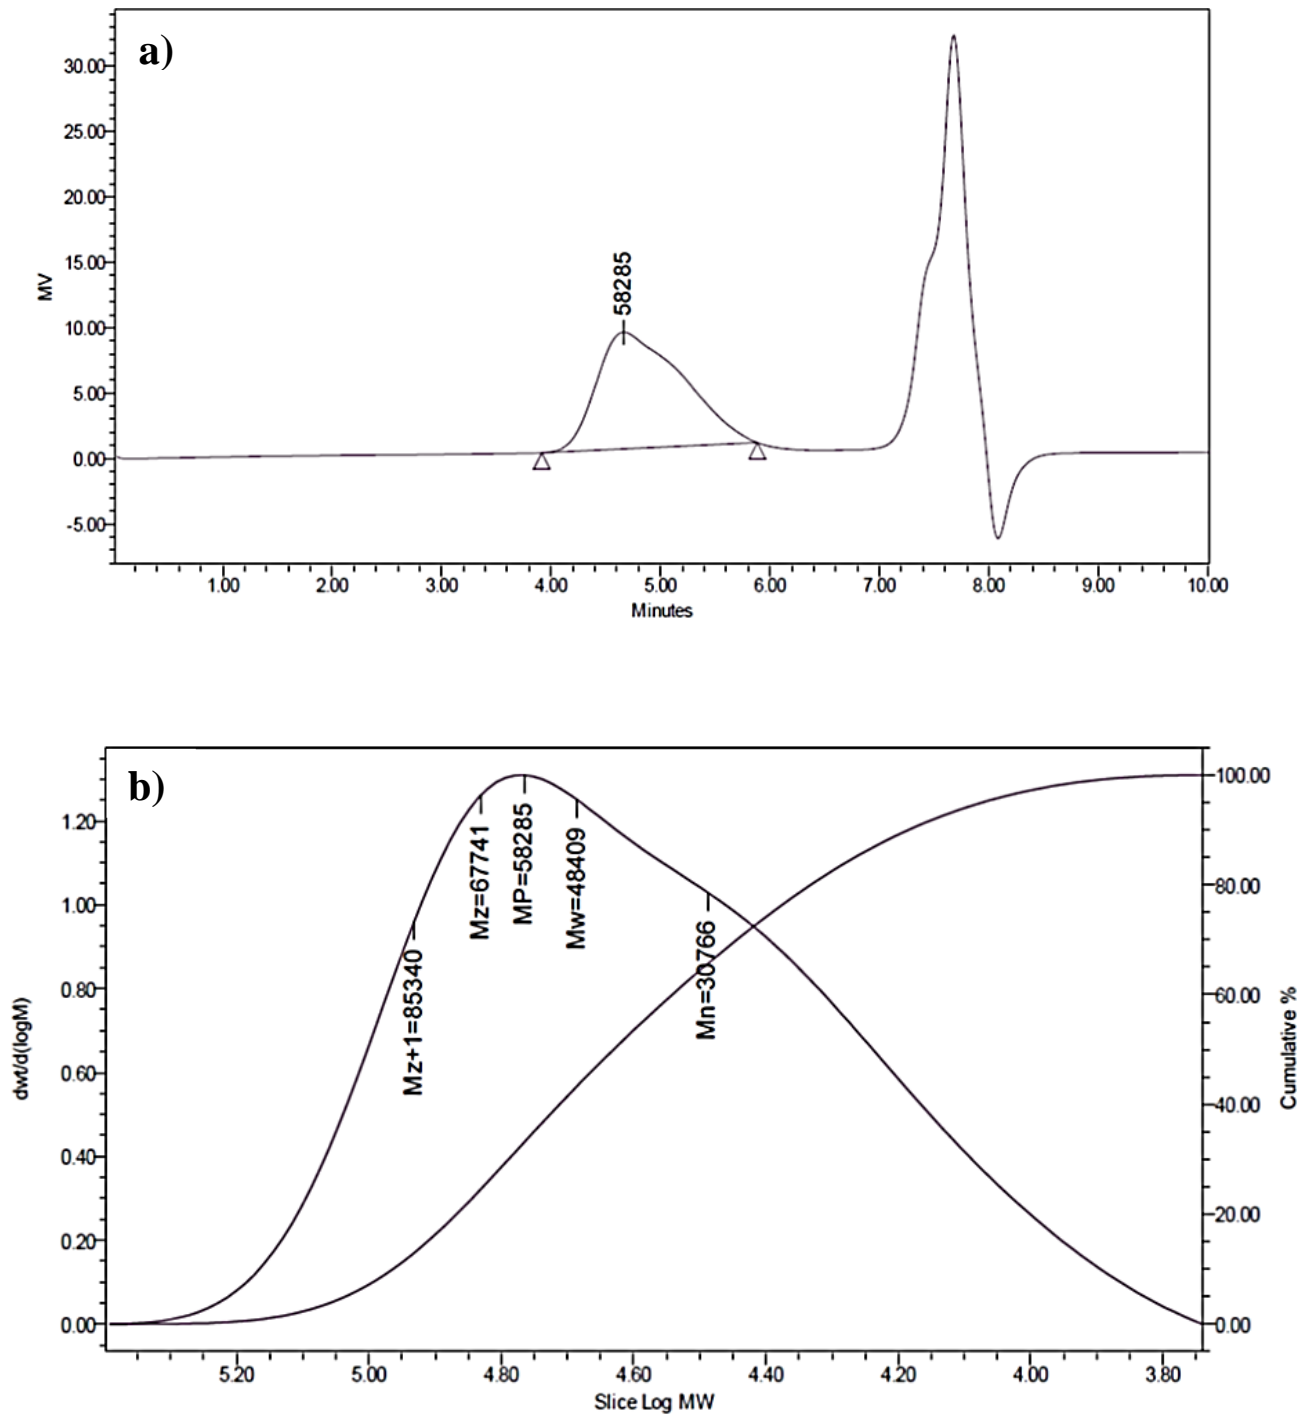

**Fig S5:** GPC profile of **PEO** a) complete chromatogram, and b) expanded region of polymer peak.

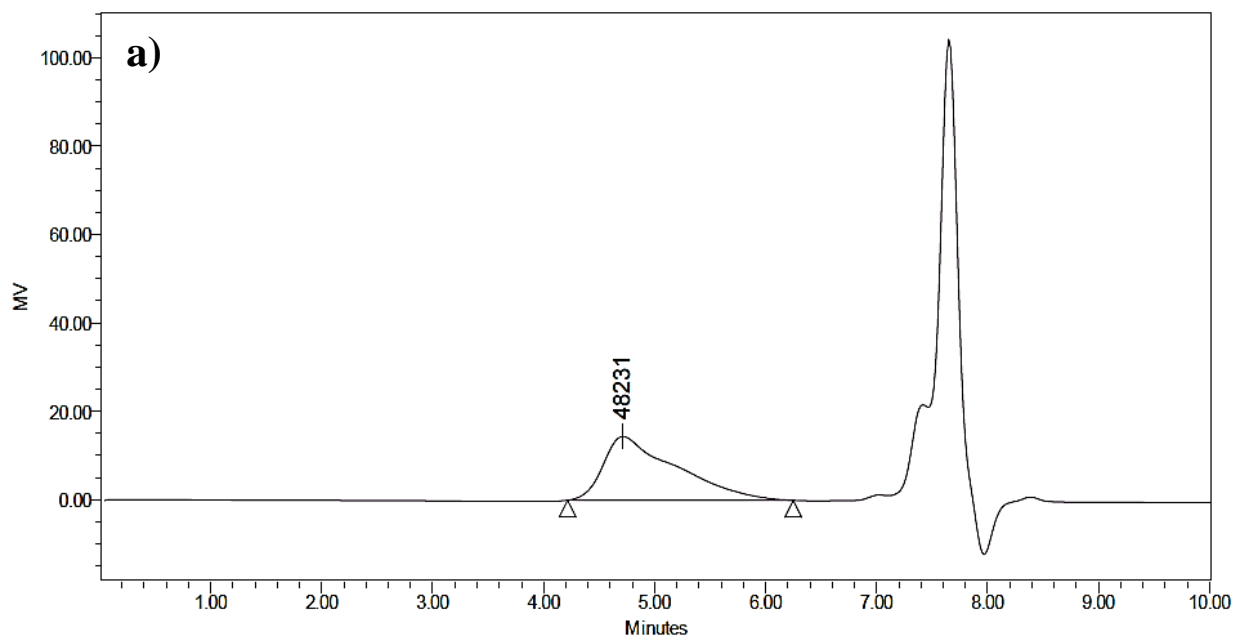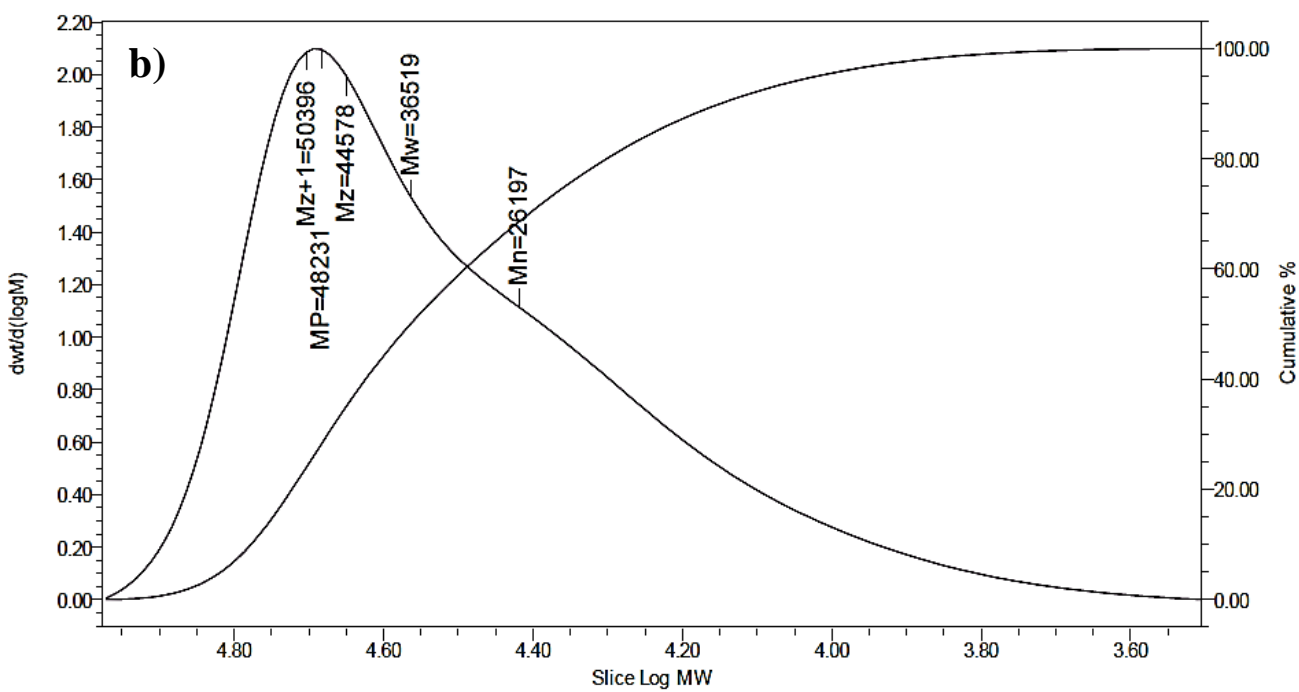

**Fig S6:** GPC profile of **PEH** a) complete chromatogram, and b) expanded region of polymer peak.

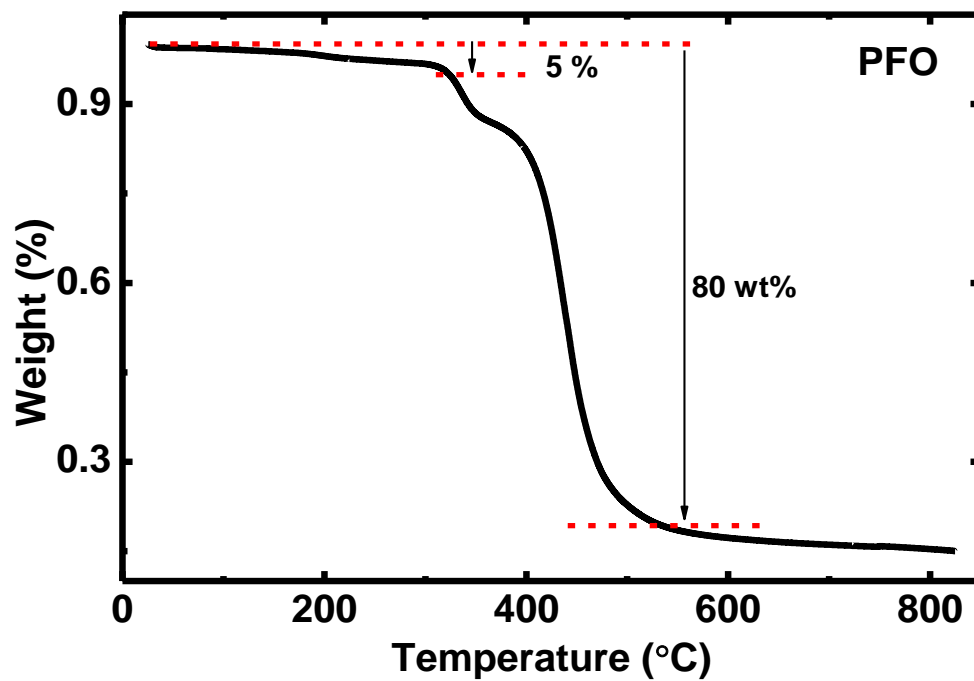

Fig. S7: Thermogravimetric analysis (TGA) profile of PFO.

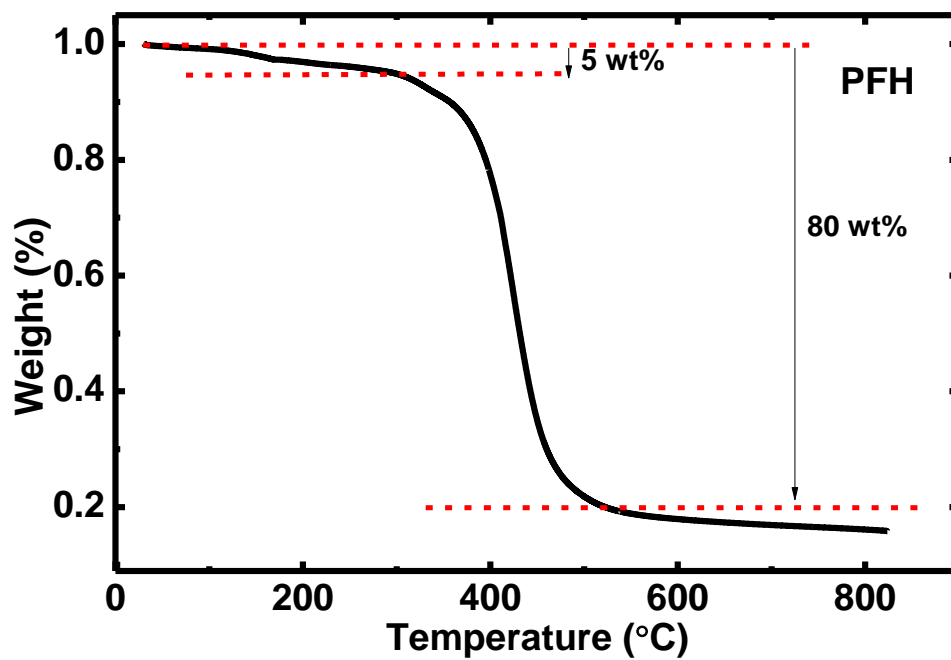

Fig. S8: TGA profile of PFH.

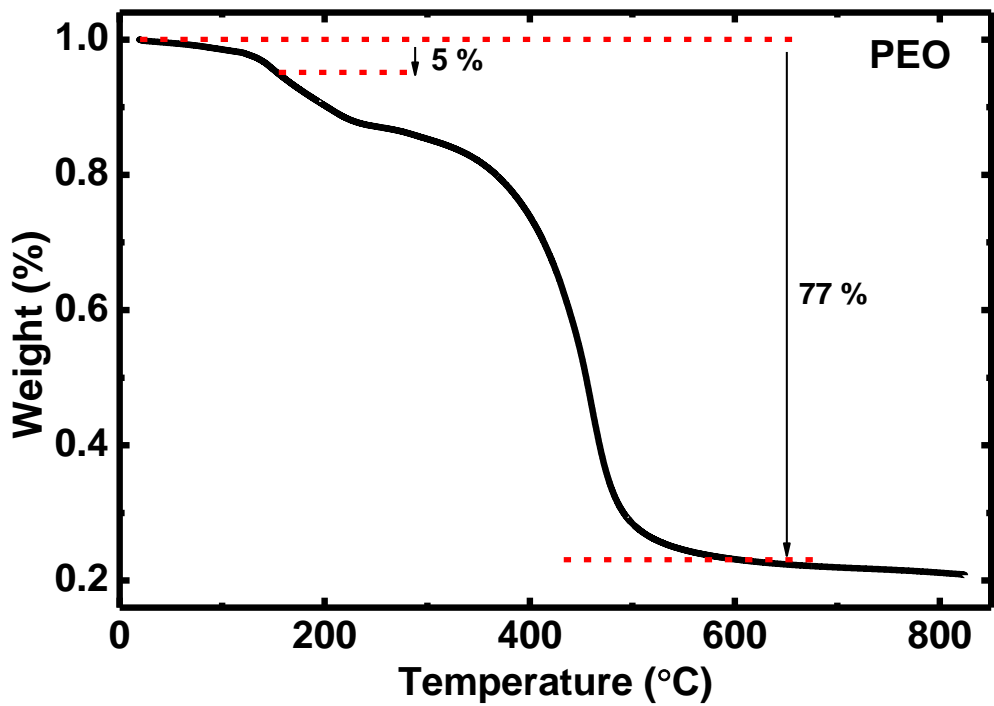

Fig. S9: TGA profile of PEO.

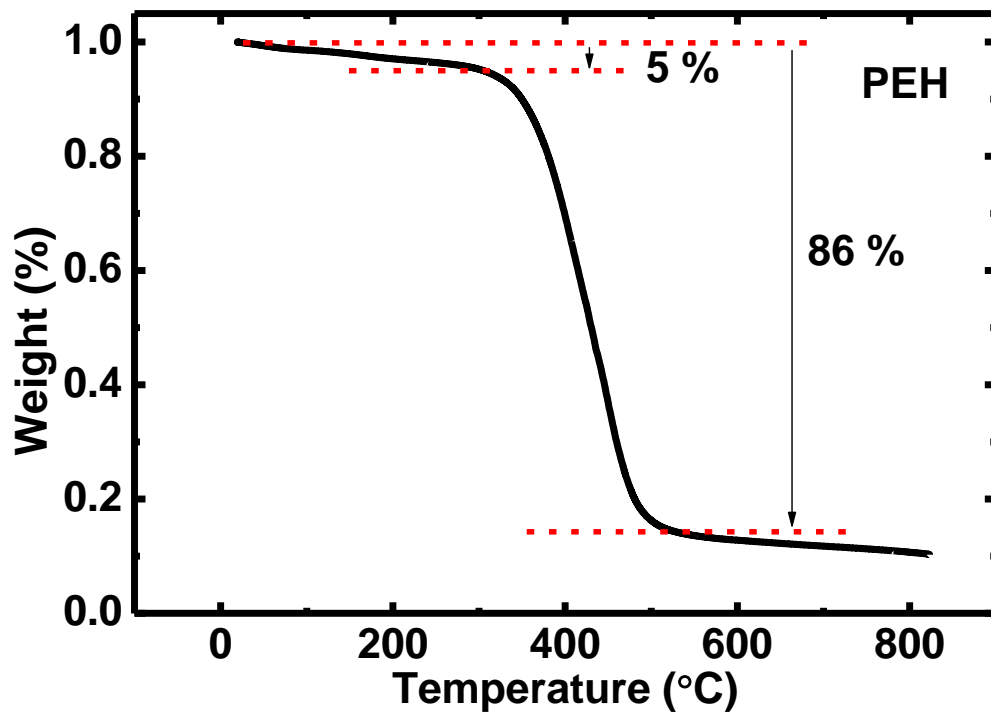

Fig. S10: TGA profile of PEH.

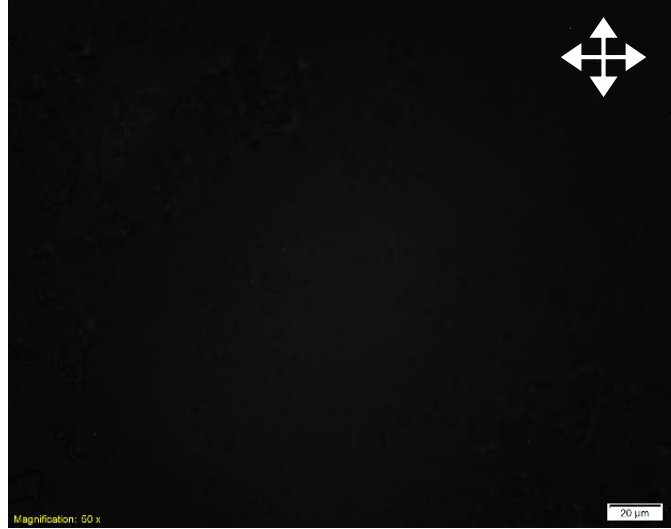

**Fig. S11:** POM image of pure PFO polymer film.

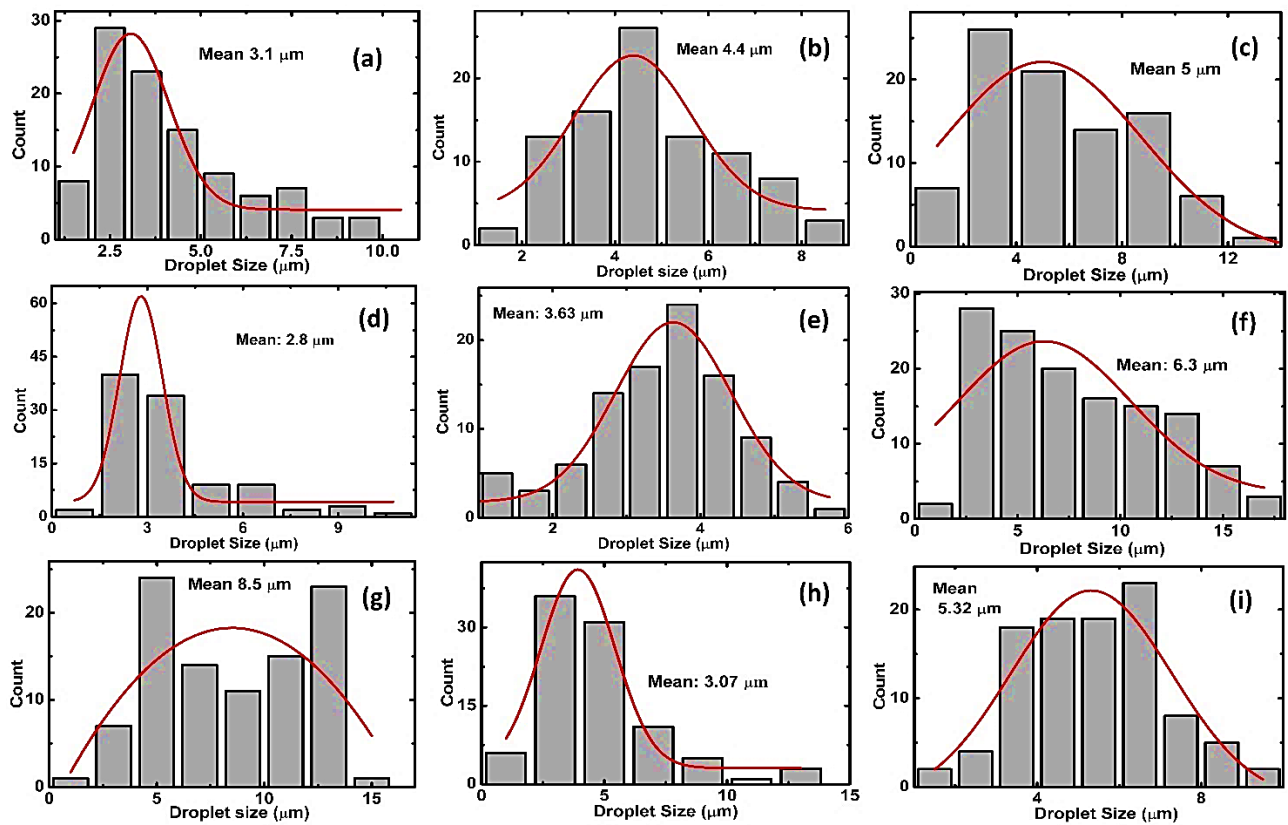

**Fig. S12:** Droplet size obtained using POM images of (a) PFO6, (b) PFO5, (c) PFO4, (d) PFH5, (e) PEO6, (f) PEO5, (g) PEO4, (h) PEH5 and (i) PEH4 samples.

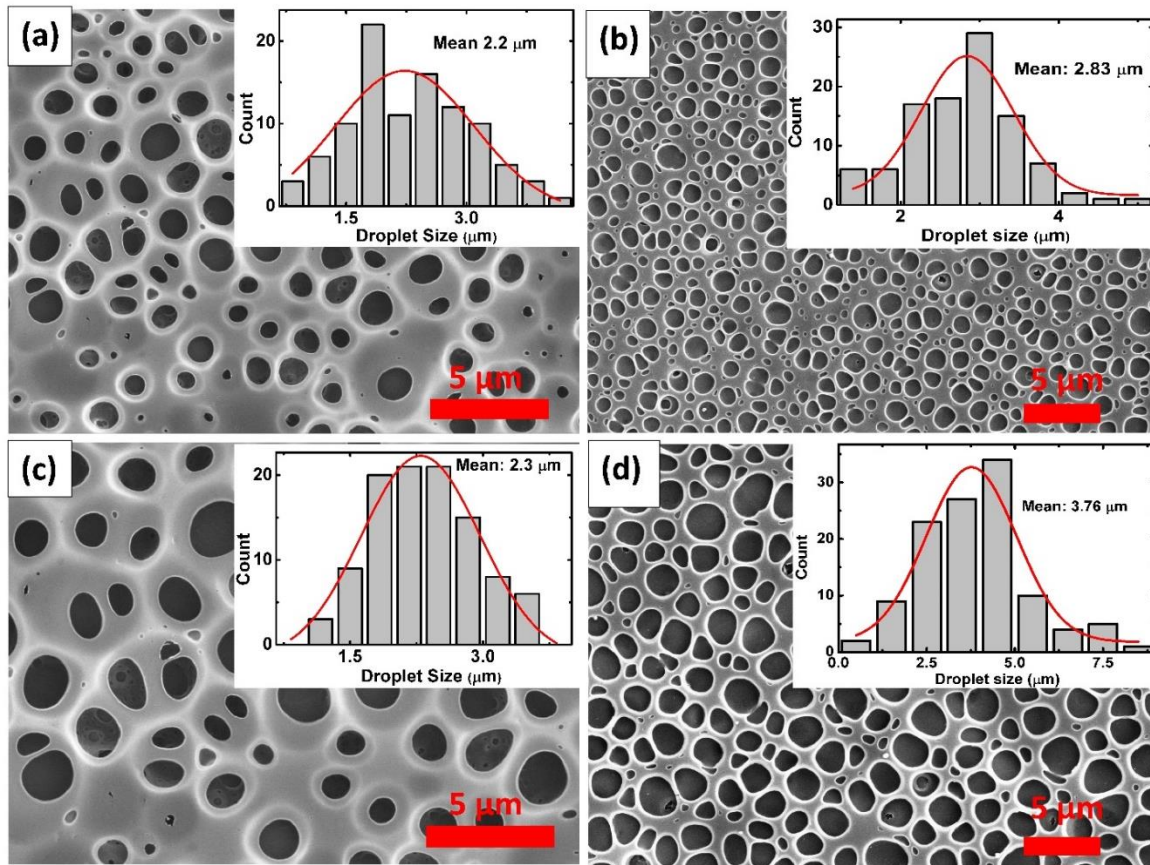

**Fig. S13:** FESEM images of (a) PFH, (b) PFH5, (c) PEH, and (d) PEH5 sample.

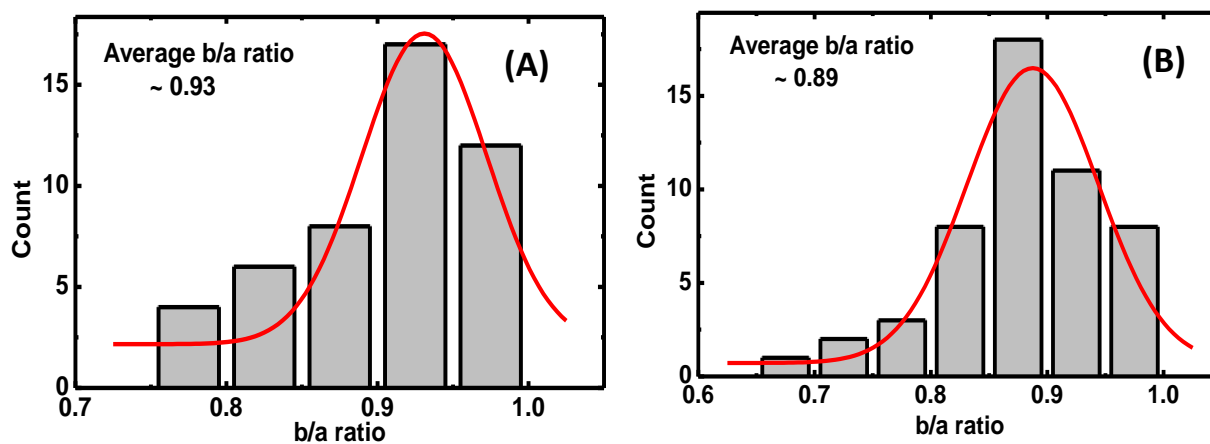

**Fig. S14:** The minor to major axis ( $b/a$ ) ratio of the droplets calculated using FESEM images of (A) PFO and (B) PEO samples.

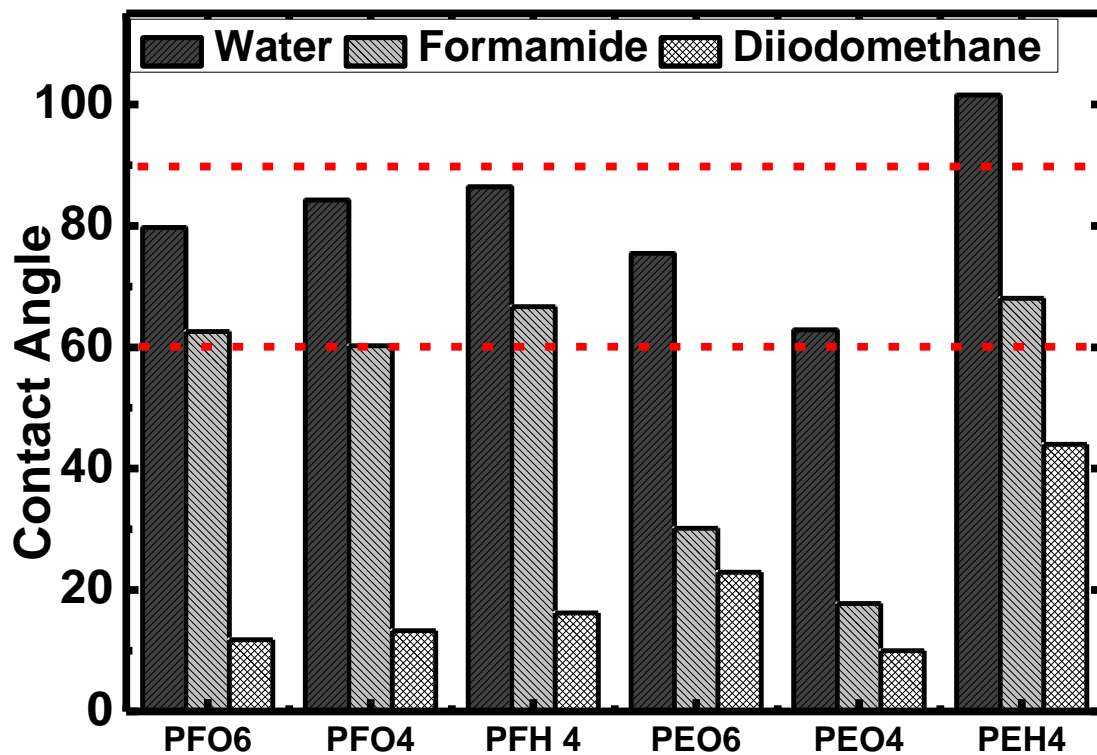

Fig. S15: Contact angle of PFO6, PFO4, PFH4, PEO6, PEO4, and PEH4 PDLC sample with diiodomethane, formamide, and water.

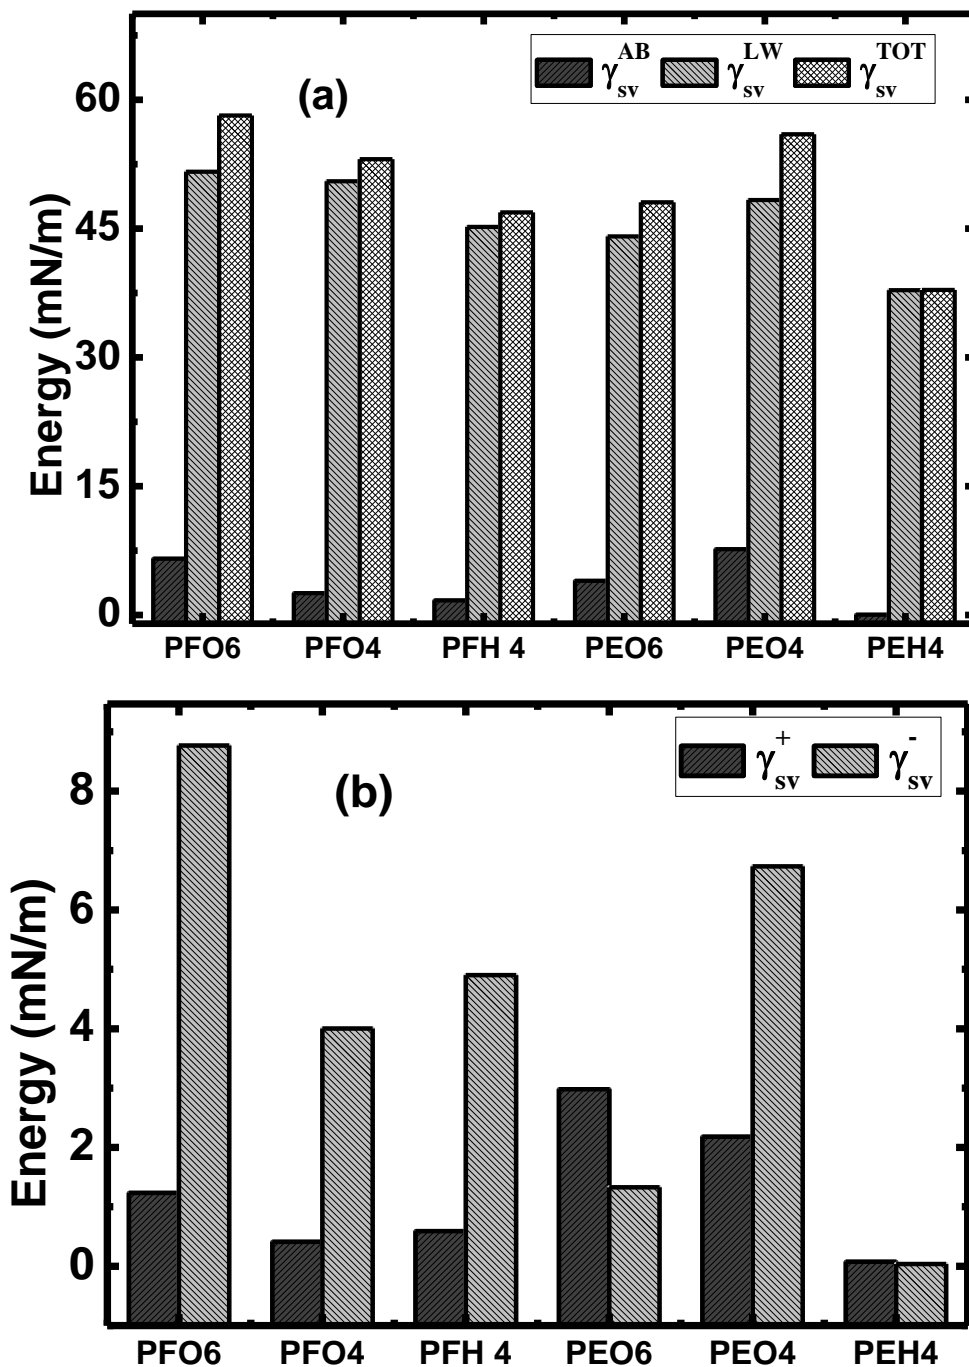

**Fig. S16:** Total surface free energy and its components of **PFO6**, **PFO4**, **PFH4**, **PEO6**, **PEO4**, and **PEH4** PDLC sample.



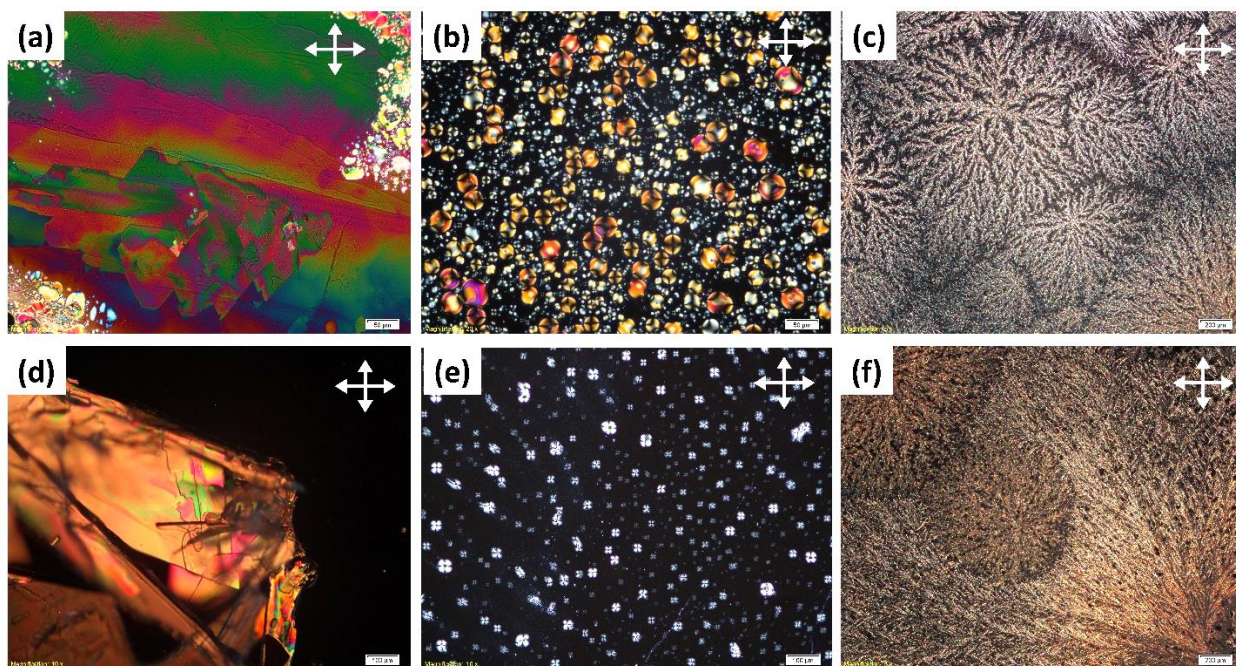

**Fig. S17:** POM images under crossed polarizers of **PFO5** and **PEO5** sample after the drop-casting solution of pH (table S5) (a, d) 4, (b, e) 7, and (c, f) 10.

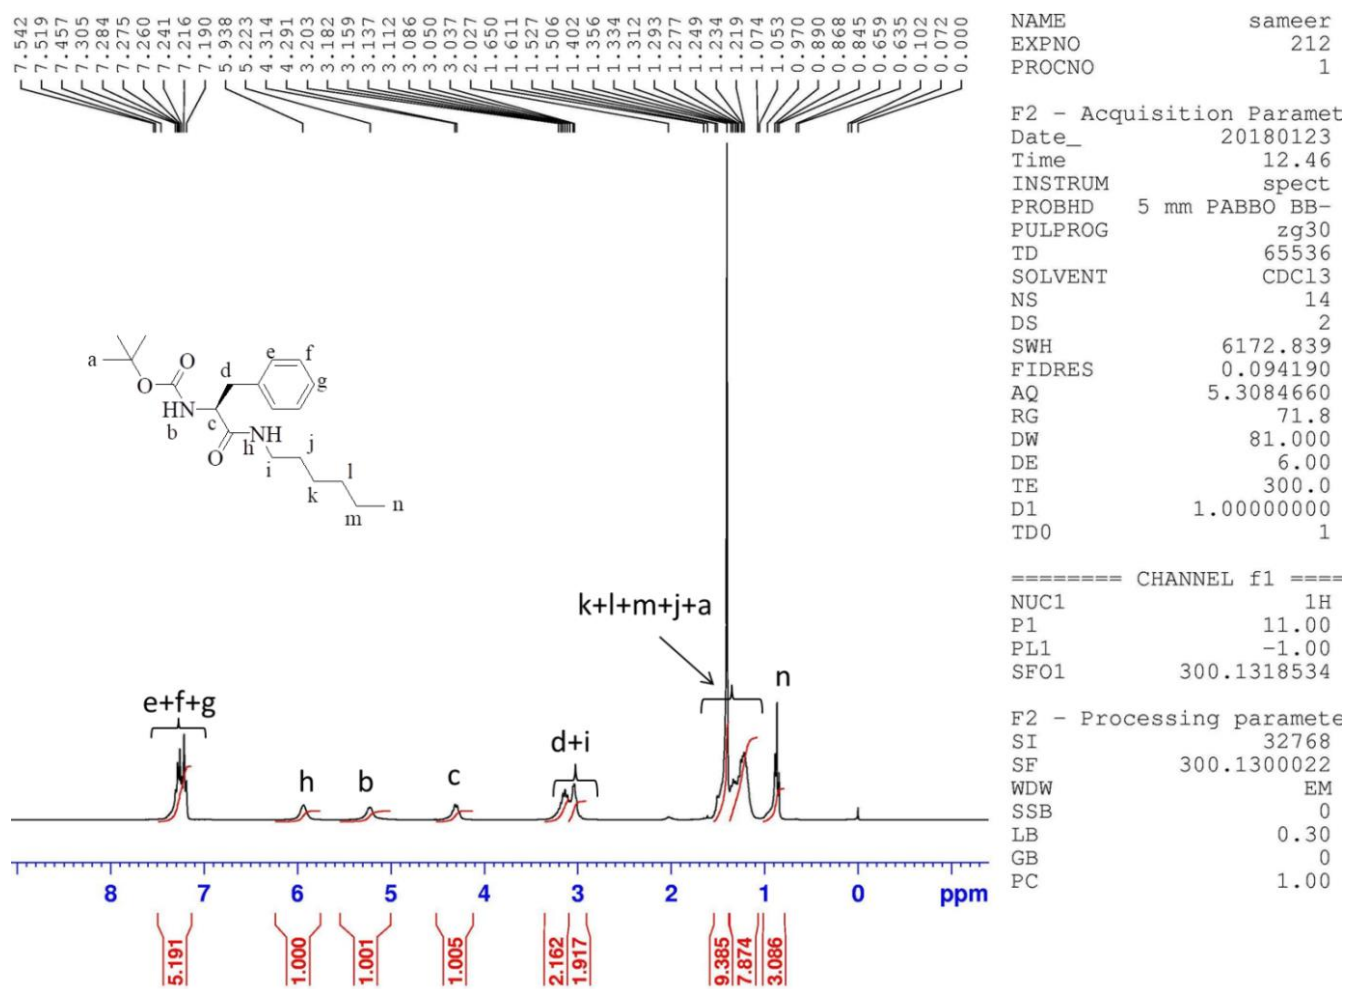

Fig. S18: <sup>1</sup>H NMR (300 MHz, CDCl<sub>3</sub>) spectrum of A1.

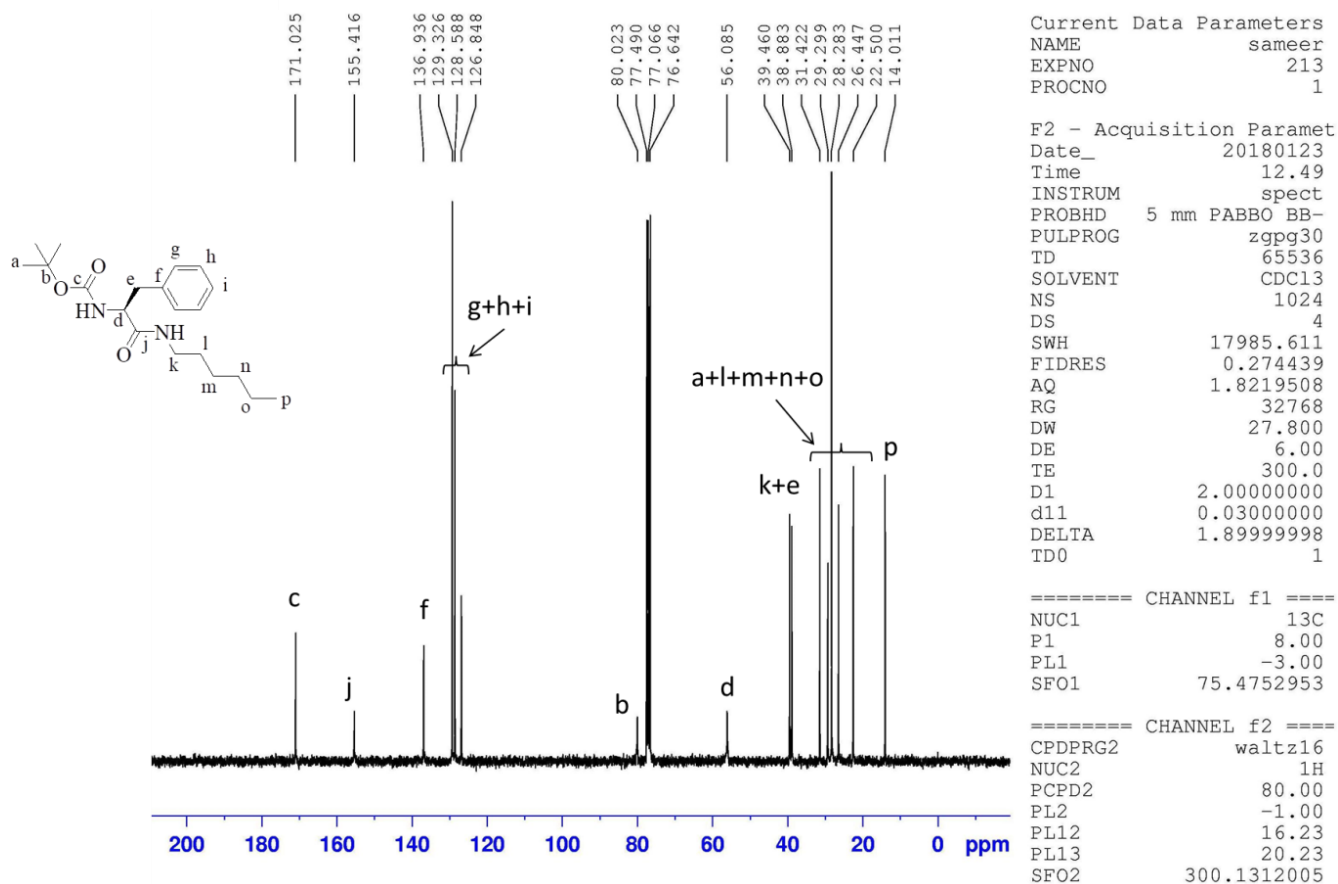

Fig. S19:  $^{13}\text{C}$  NMR (75 MHz,  $\text{CDCl}_3$ ) spectrum of A1.

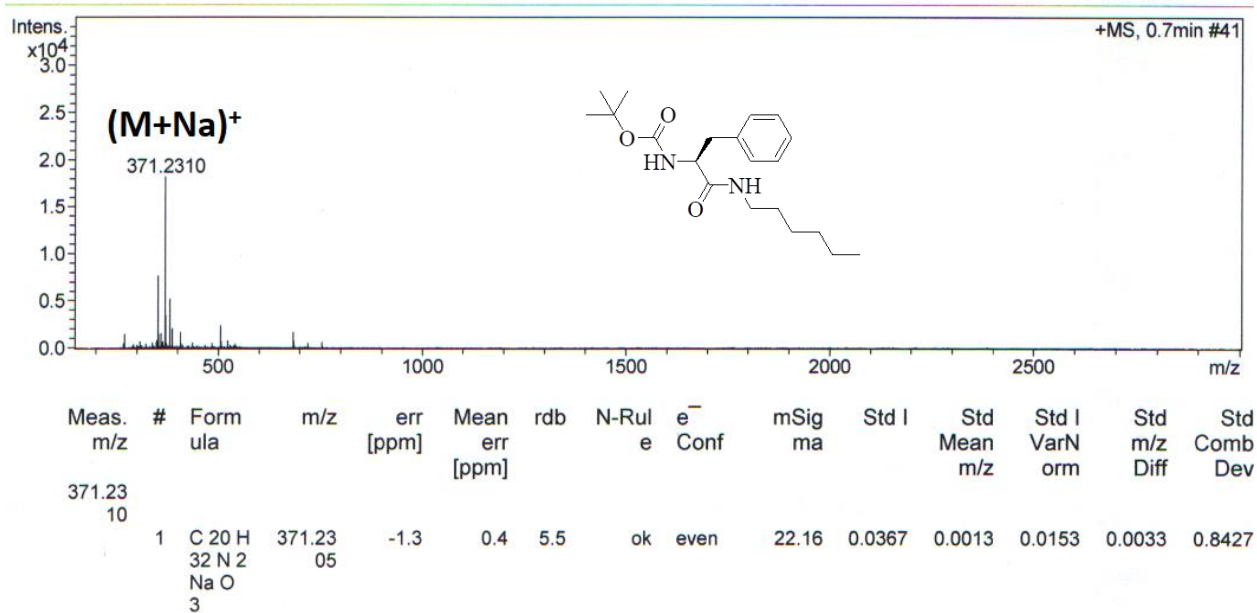

Fig. S20: ESI-Mass spectrum of A1.

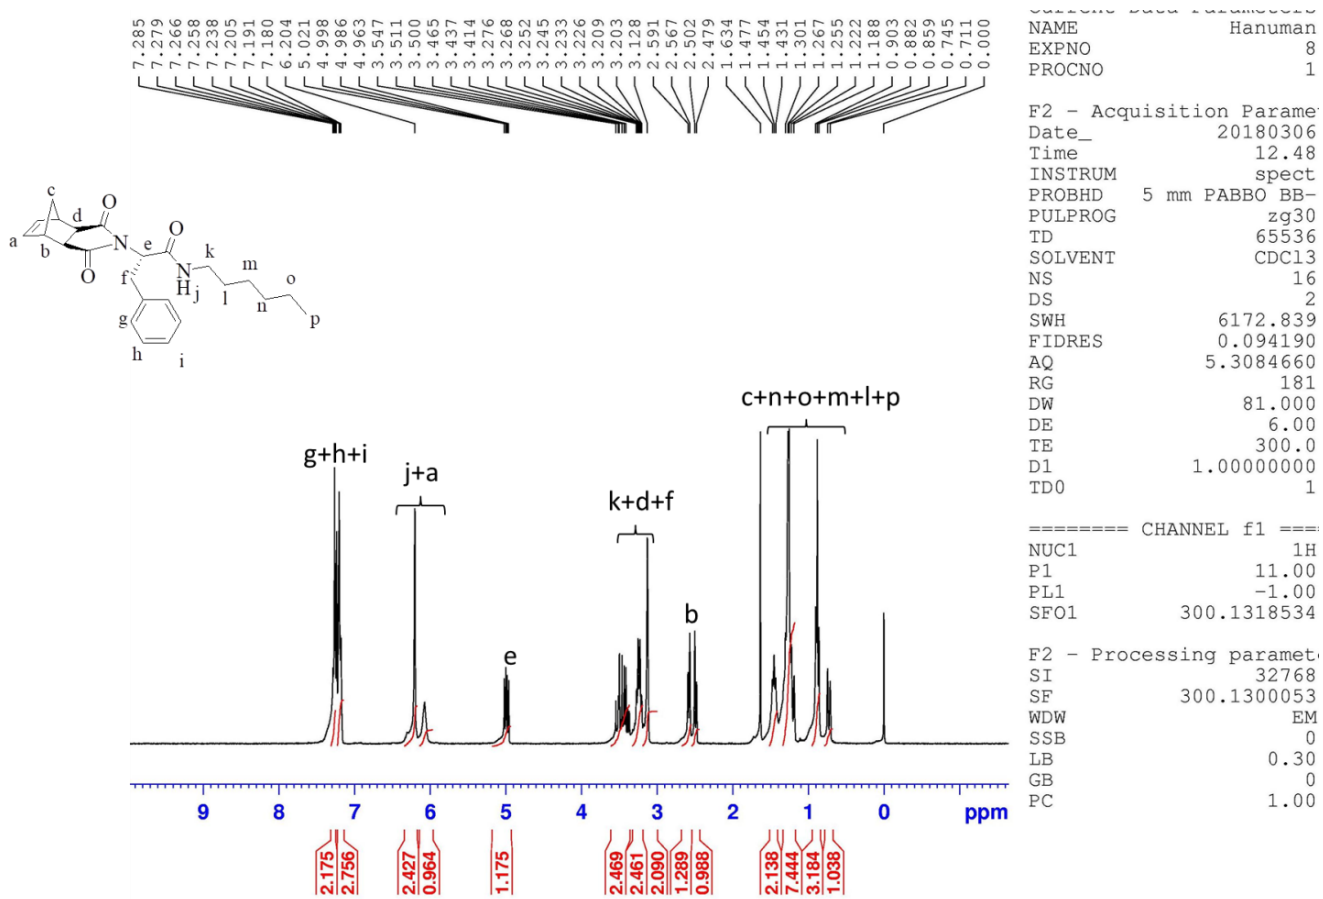

**Fig. S21:** <sup>1</sup>H NMR (300 MHz, CDCl<sub>3</sub>) spectrum of **FH**.

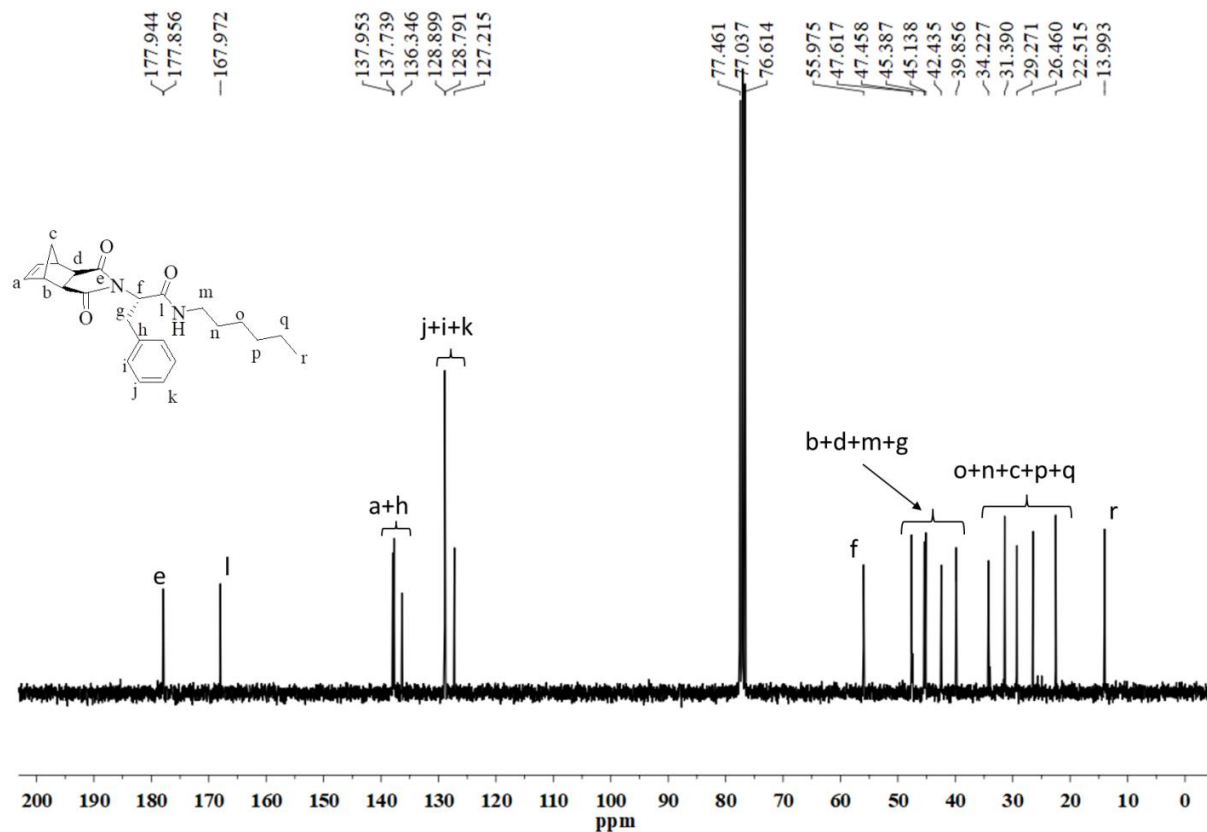

Fig. S22: <sup>13</sup>C NMR (75 MHz, CDCl<sub>3</sub>) spectrum of FH.

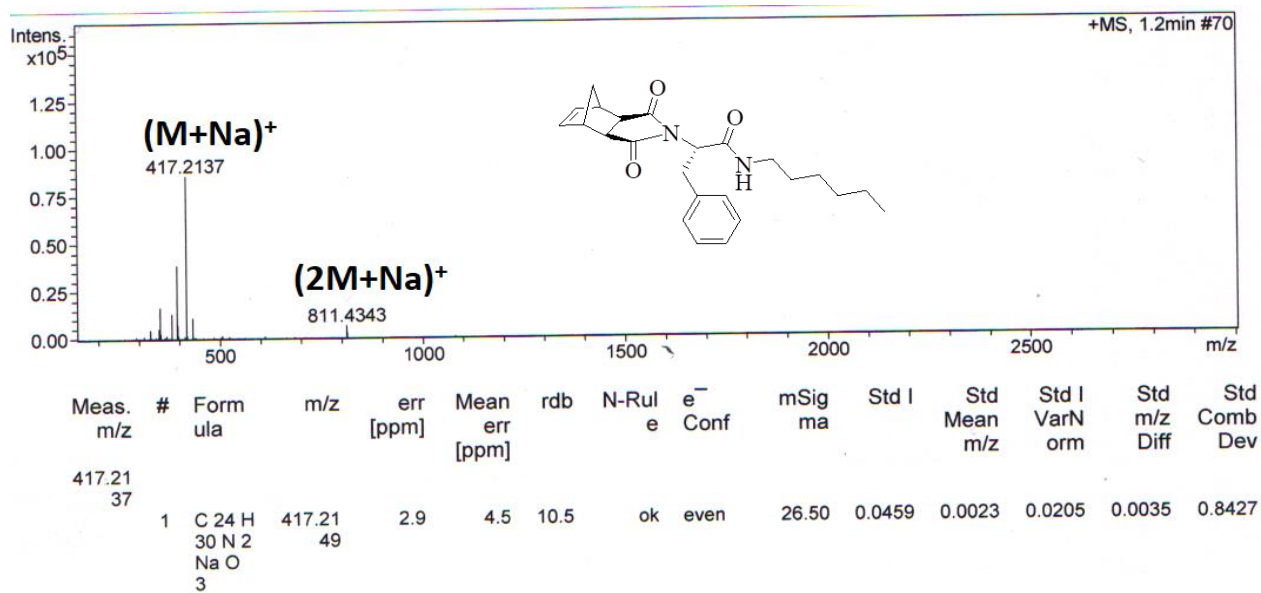

Fig. S23: ESI-Mass spectrum of FH.

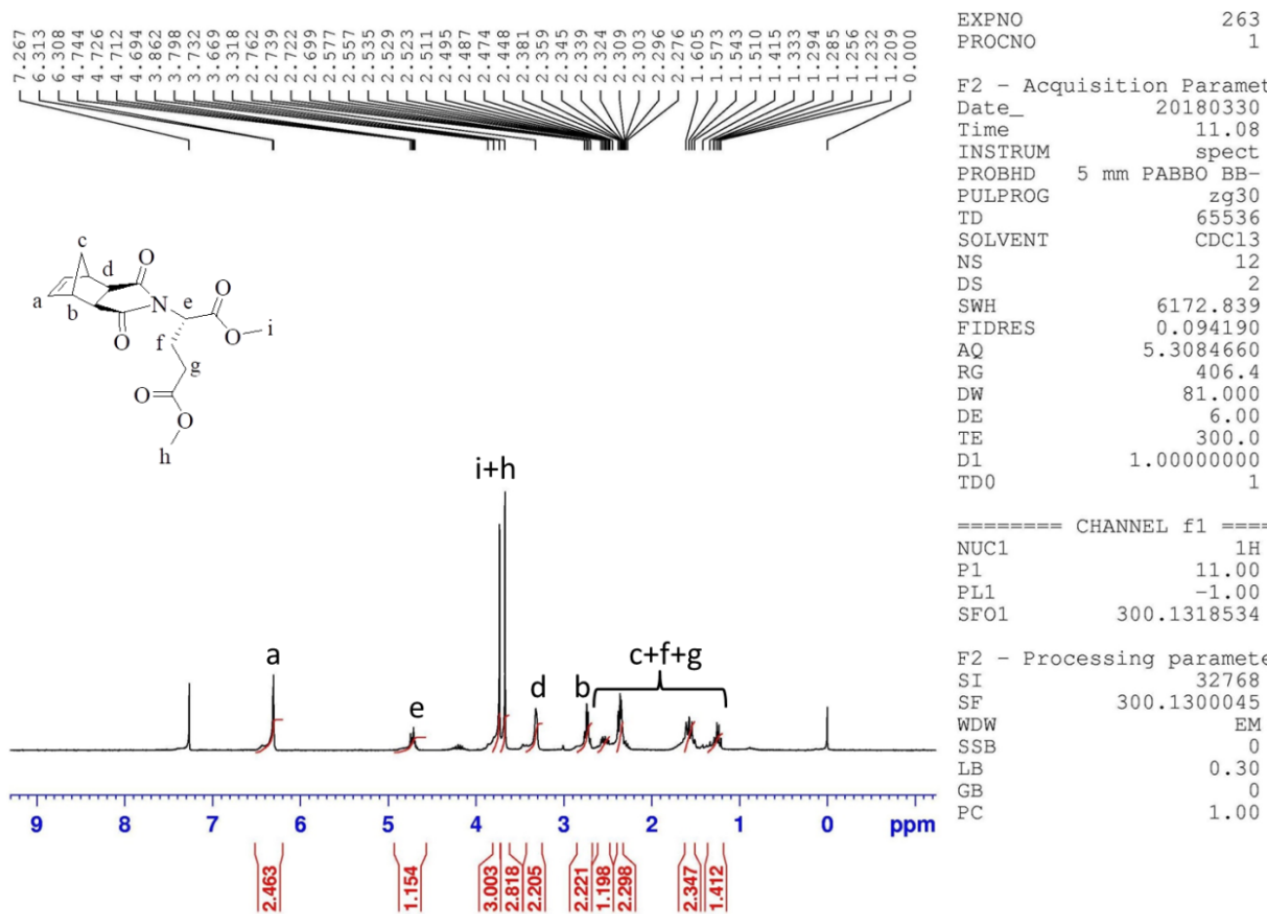

Fig. S24:  $^1\text{H}$  NMR (300 MHz,  $\text{CDCl}_3$ ) spectrum of EO.

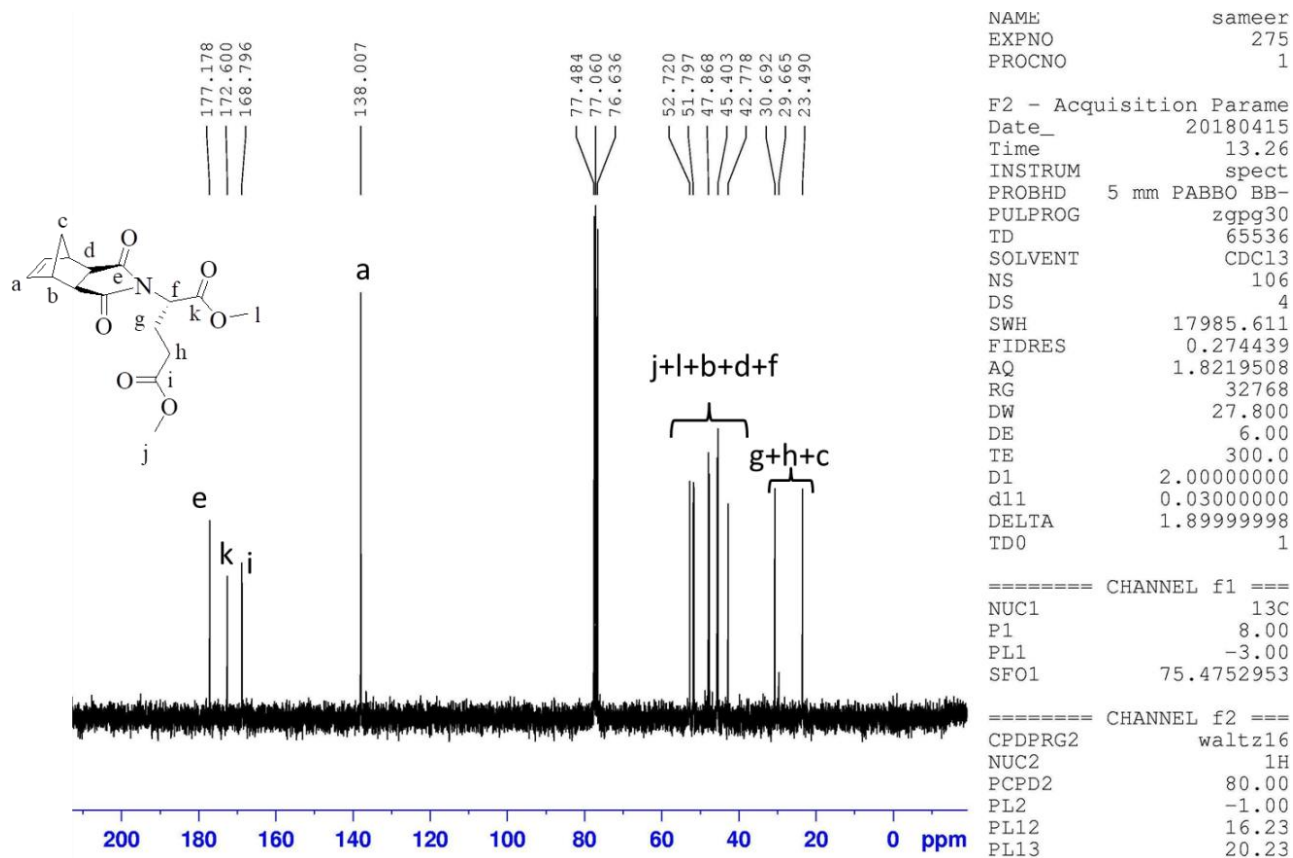

Fig. S25: <sup>13</sup>C NMR (75 MHz, CDCl<sub>3</sub>) spectrum of EO.

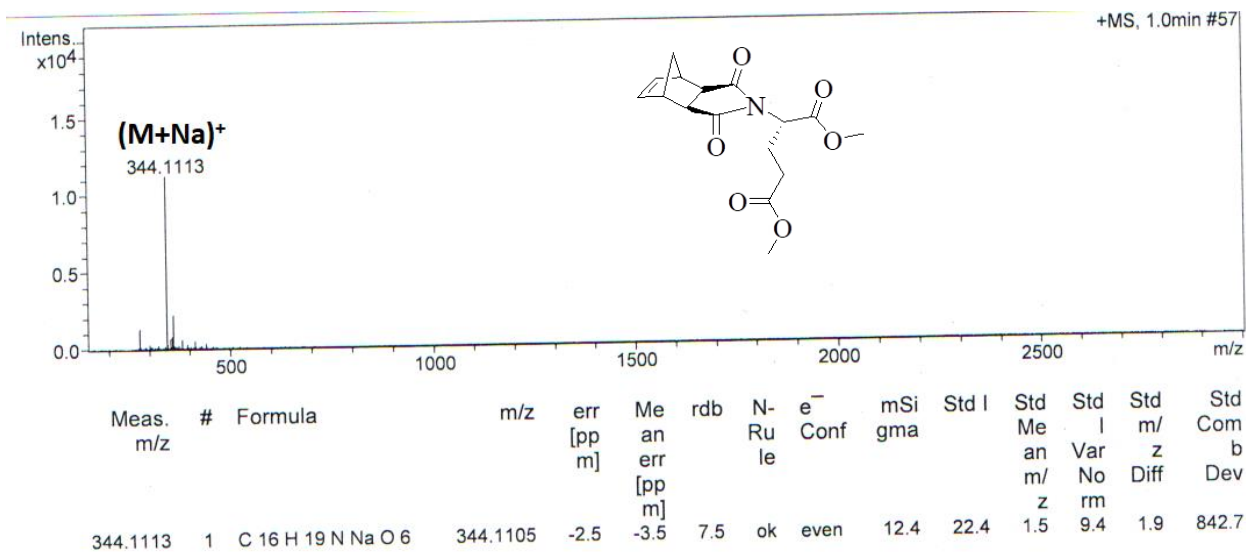

Fig. S26: ESI-Mass spectrum of EO.

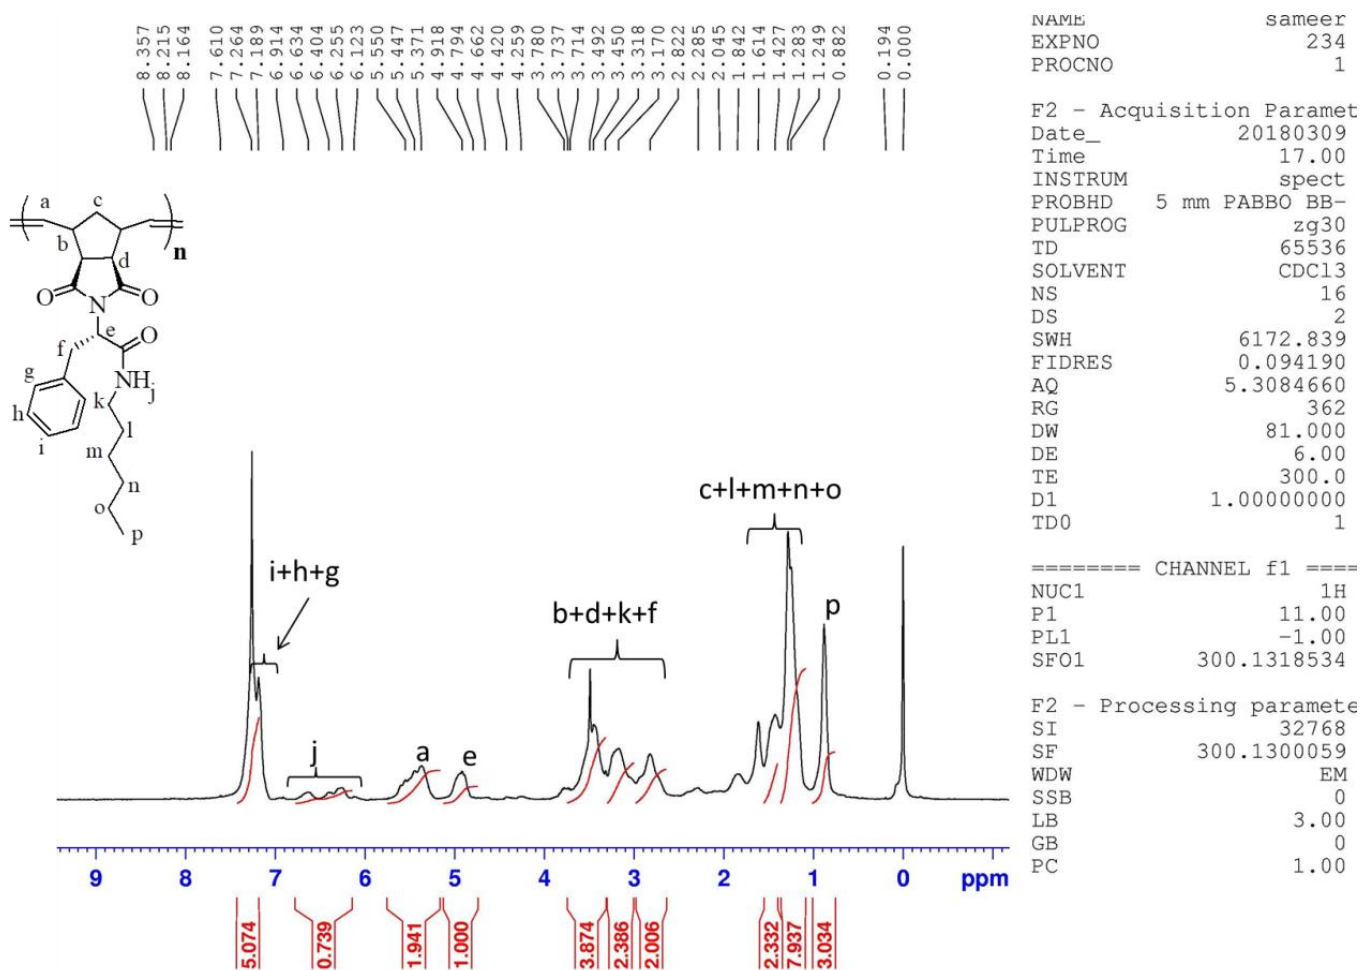

Fig. S27:  $^1\text{H}$  NMR (300 MHz,  $\text{CDCl}_3$ ) spectrum of **PFH**.



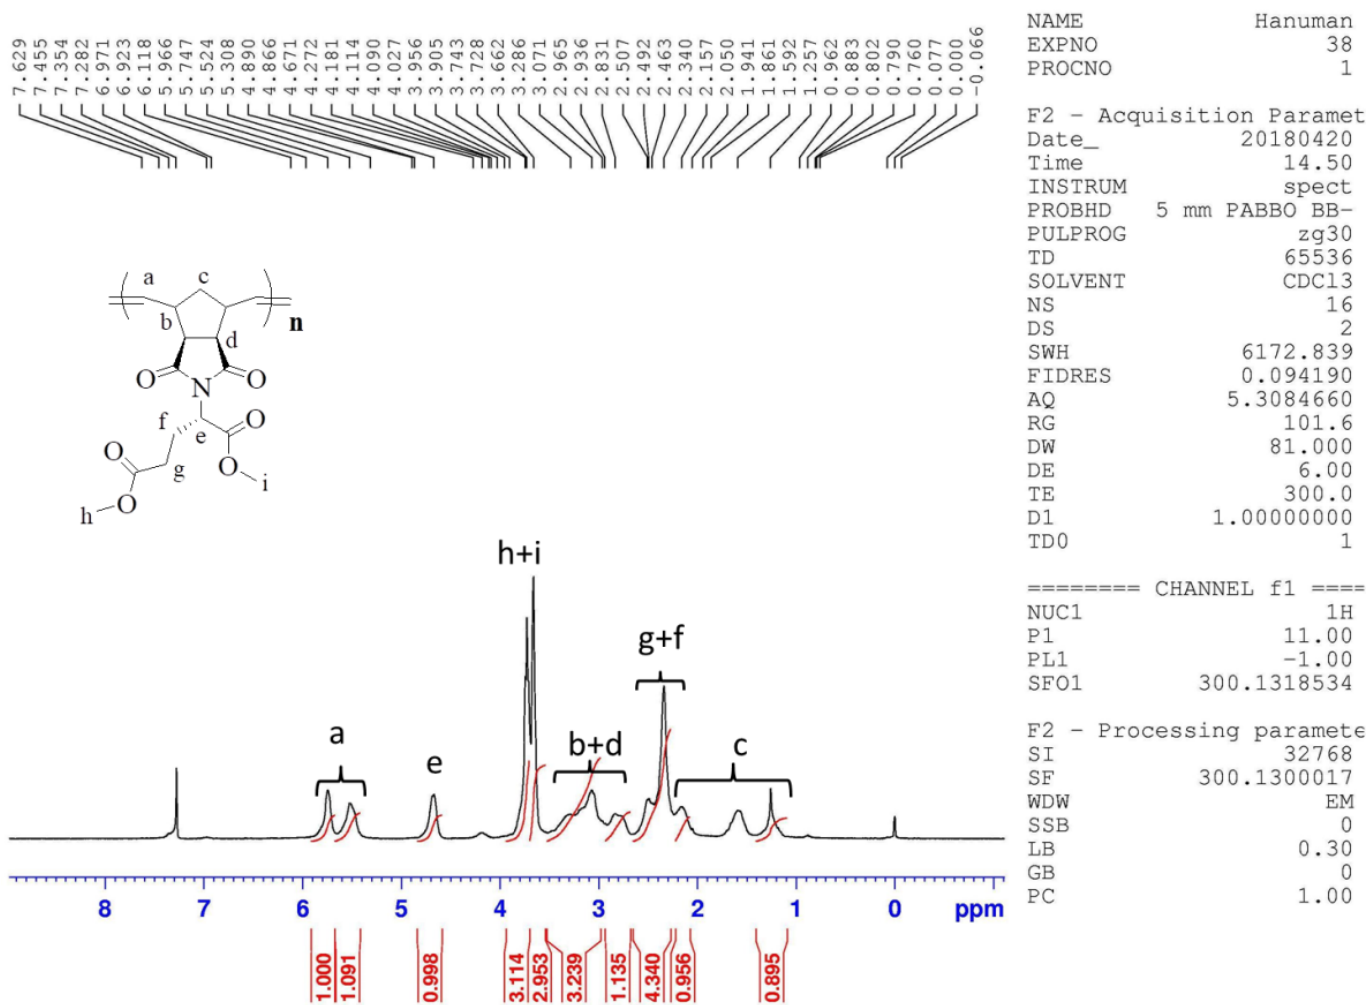

**Fig. S28:** <sup>1</sup>H NMR (300 MHz, CDCl<sub>3</sub>) spectrum of PEO.

### Reference

- 1 H. N. Po and N. M. Senozan, *J. Chem. Educ.*, 2001, **78**, 1499.
